# Supplementary material for: Afadin sorts different retinal neuron types into accurate cellular layers
Source: eLife. 2026 Jan 14;14:RP105575. doi: 10.7554/eLife.105575 (PMC12803510; doi:10.7554/eLife.105575)
Supplement: Figure 1—source data 1. [file elife-105575-fig1-data1.xlsx]

## Sheet: P14 with Melissa
3 mice per experimental condition; littermates; embed both eyes and take 3 images per mouse near central retina; P14; stain with RBPMS/Chx10/Ap2a
2048; 400; 0.75x; 2; 5.00
Looking at channels 1/4 toggle between and count RBPMS/DAPI+ cells that are in GCL and displaced
	Total RGCs	Number Displaced	Ratio Displaced			Average	SD
2694 img1	64	27	0.421875		cKO	0.374204	0.0734423
2694 img2	63	25	0.396825		Control	0.0134242	0.00209644
2694 img3	67	25	0.373134
Avg			0.397278			0.397278	0.0157563
						0.433338	0.0128205
2695 img1	57	23	0.403509			0.291995	0.0116959
2695 img2	48	26	0.541667
2695 img3	62	22	0.354839		ttest	0.00104817
Avg			0.433338
2696img1	65	30	0.461538
2696img2	59	9	0.152542
2696img3	42	11	0.261905
Avg			0.291995
2697img1	56	1	0.0178571
2697img2	53	0	0
2697img3	68	2	0.0294118
Avg			0.0157563
2698img1	50	0	0
2698img2	58	0	0
2698img3	52	2	0.0384615
Avg			0.0128205
2699img1	57	1	0.0175439
2699img2	57	1	0.0175439
2699img3	56	0	0
Avg			0.0116959

## Sheet: P14 new method
3 mice per experimental condition; littermates; embed both eyes and take 5 consecutive images per mouse near single central retina section; P14; stain with RBPMS/Chx10/Ap2a
2024; 400; 0.75x; 2; NA
Looking at channels 1/4 toggle between and count RBPMS/DAPI+ cells that are in GCL and displaced
	Total RGCs	Number Displaced	Ratio Displaced			Average	SD
2694 img1	53	19	0.358491		Control	0.0133463	0.0138068
2694 img2	44	21	0.477273		cKO	0.343652	0.0447542
2694 img3	39	9	0.230769
2695 img1	40	16	0.4
2695 img2	33	13	0.393939			0.00487805	0.372094
Avg			0.372094			0.00588235	0.292065
						0.0292784	0.366797
2695 img1	37	7	0.189189
2695 img2	32	12	0.375		0.000257862
2695 img3	36	18	0.5
2696 img1	23	4	0.173913
2696 img2	9	2	0.222222
Avg			0.292065
2696img1	21	8	0.380952
2696img2	40	14	0.35
2696img3	46	25	0.543478
2696img4	26	7	0.269231
2696img5	31	9	0.290323
Avg			0.366797
2697img1		0	0
2697img2	41	1	0.0243902
2697img3		0	0
2697img4		0	0
2697img5		0	0
Avg			0.00487805
2698img1	34	1	0.0294118
2698img2		0	0
2698img3		0	0
2698img4		0	0
2698img5		0	0
Avg			0.00588235
2699img1		0	0
2699img2	39	2	0.0512821
2699img3	41	1	0.0243902
2699img4	31	1	0.0322581
2699img5	26	1	0.0384615
Avg			0.0292784

## Sheet: P14 new method (2)
3 mice per experimental condition; littermates; embed both eyes and take 5 images per mouse near single central retina section; P14; stain with RBPMS/Chx10/Ap2a
1024; 400; 0.75x; 2; NA
Displaced for Ap2 is in upper half of INL/ONL; displaced for Chx10 is in upper half of INL/OPL or GCL; displaced for RBPMS is anything outside of GCL
Looking at channels 1/4 toggle between and count RBPMS/DAPI+ cells (always leaving DAPI) that are in GCL and displaced (same for Chx10 and Ap2a) using auto B&C; cyan/grays
	Total RBPMS	Number Displaced	Ratio Displaced	Total Ap2a	Number Displaced	Ratio Displaced	Total Chx10	Number Displaced	Ratio Displaced
2694img1	31	14	0.451613	174	64	0.367816	307	142	0.462541				Control Avg	SD	cKO Avg	SD
2694img2	52	13	0.25	150	53	0.353333	319	120	0.376176			RBPMS	0.0073461	0.00947325	0.337264	0.0108647
2694img3	51	21	0.411765	163	69	0.423313	289	85	0.294118			Ap2a	0.131151	0.00336402	0.41817	0.0355732
2694img4	28	11	0.392857	132	53	0.401515	297	99	0.333333			Chx10	0.00176819	0.00250396	0.374346	0.0245775
2694img5	42	10	0.238095	138	47	0.34058	297	111	0.373737
Avg	40.8		0.348866	151.4		0.377311	301.8		0.367981									RBMPS Control	RBPMS cKO	Ap2a Control	Ap2a cKO	Chx10 Control	Chx10 cKO
													Control	cKO				0.004	0.348866	0.129304	0.377311	0.000671141	0.367981
2695img1	43	16	0.372093	185	81	0.437838	393	156	0.396947			RGCs	0.0073461	0.337264				0	0.335595	0.129115	0.442261	0.00463343	0.40148
2695img2	30	13	0.433333	198	96	0.484848	392	177	0.451531			ACs	0.131151	0.41817				0.0180383	0.32733	0.135034	0.434936	0	0.353578
2695img3	34	7	0.205882	151	62	0.410596	350	105	0.3			BCs	0.00176819	0.374346			p value	2.4192e-06		0.000154769		1.27623e-05
2695img4	21	7	0.333333	136	57	0.419118	343	112	0.326531
2695img5	24	8	0.333333	146	67	0.458904	355	189	0.532394
Avg	30.4		0.335595	163.2		0.442261	366.6		0.40148
2696img1	29	5	0.172414	170	75	0.441176	311	74	0.237942
2696img2	26	5	0.192308	172	68	0.395349	321	103	0.320872
2696img3	40	17	0.425	224	109	0.486607	313	122	0.389776
2696img4	47	15	0.319149	221	100	0.452489	360	136	0.377778
2696img5	36	19	0.527778	213	85	0.399061	342	151	0.44152
Avg	35.6		0.32733	200		0.434936	329.4		0.353578
2697img1	37	0	0	166	23	0.138554	328	0	0
2697img2	50	1	0.02	158	18	0.113924	312	0	0
2697img3	43	0	0	163	18	0.110429	298	1	0.0033557
2697img4	30	0	0	149	23	0.154362	282	0	0
2697img5	38	0	0	147	19	0.129252	319	0	0
Avg	39.6		0.004	156.6		0.129304	307.8		0.000671141
2698img1	32	0	0	201	22	0.109453	319	0	0
2698img2	25	0	0	188	35	0.18617	307	6	0.019544
2698img3	35	0	0	182	24	0.131868	276	1	0.00362319
2698img4	31	0	0	158	20	0.126582	288	0	0
2698img5	33	0	0	153	14	0.0915033	328	0	0
Avg	31.2		0	176.4		0.129115	303.6		0.00463343
2699img1	46	1	0.0217391	172	23	0.133721	328	0	0			Numbers	Control	cKORet				Std dev			p-value
2699img2	48	1	0.0208333	152	17	0.111842	335	0	0			RGCs	37.8667	35.6		0.487483		7.09997	9.81107		0.487483
2699img3	42	2	0.047619	148	14	0.0945946	311	0	0			ACs	165.933	171.533		0.635841		16.3159	30.9028		0.635841
2699img4	38	0	0	181	31	0.171271	401	0	0			BCs	314.318	332.6				27.8959	32.9389		0.0868869
2699img5	40	0	0	171	28	0.163743	300	0	0
Avg	42.8		0.0180383	164.8		0.135034	335		0

## Sheet: P14 for Tableau
Image	Displaced RBPMS	Displaced Ap2a	Displaced Chx10
2694img1	0.451613	0.367816	0.462541
2694img2	0.25	0.353333	0.376176
2694img3	0.411765	0.423313	0.294118
2694img4	0.392857	0.401515	0.333333
2694img5	0.238095	0.34058	0.373737
2695img1	0.372093	0.437838	0.396947
2695img2	0.433333	0.484848	0.451531
2695img3	0.205882	0.410596	0.3
2695img4	0.333333	0.419118	0.326531
2695img5	0.333333	0.458904	0.532394
2696img1	0.172414	0.441176	0.237942
2696img2	0.192308	0.395349	0.320872
2696img3	0.425	0.486607	0.389776
2696img4	0.319149	0.452489	0.377778
2696img5	0.527778	0.399061	0.44152
2697img1	0	0.138554	0
2697img2	0.02	0.113924	0
2697img3	0	0.110429	0.0033557
2697img4	0	0.154362	0
2697img5	0	0.129252	0
2698img1	0	0.109453	0
2698img2	0	0.18617	0.019544
2698img3	0	0.131868	0.00362319
2698img4	0	0.126582	0
2698img5	0	0.0915033	0
2699img1	0.0217391	0.133721	0
2699img2	0.0208333	0.111842	0
2699img3	0.047619	0.0945946	0
2699img4	0	0.171271	0
2699img5	0	0.163743	0
