# Supplementary material for: Afadin sorts different retinal neuron types into accurate cellular layers
Source: eLife. 2026 Jan 14;14:RP105575. doi: 10.7554/eLife.105575 (PMC12803510; doi:10.7554/eLife.105575)
Supplement: Figure 2—figure supplement 2—source data 1. [file elife-105575-fig2-figsupp2-data1.xlsx]

## Sheet: Sheet1
Sample Name	Rosette Counts
AfadincKO 759F2L	177
AfadincKO 782F2L	164
AfadincKO 782F3R	147
AfadincKO 782F3L	152
