# Supplementary material for: Afadin sorts different retinal neuron types into accurate cellular layers
Source: eLife. 2026 Jan 14;14:RP105575. doi: 10.7554/eLife.105575 (PMC12803510; doi:10.7554/eLife.105575)
Supplement: Figure 3—source data 1. [file elife-105575-fig3-data1.xlsx]

## Sheet: Sheet1
TdTomato+RBPMS+ Displaced Raw Data
AfadinWT (n=4)
TdTomato+RBPMS+ Displaced	5	0	1	5	2
TdTomato+RBPMS+ Total	139	19	21	33	36
Fraction	0.0359712	0	0.047619	0.151515	0.0555556
Percentage	0.0359712	0	0.047619	0.151515	0.0555556
AfadincKO (n=5)
TdTomato+RBPMS+ Displaced	27	8	10	15	15
TdTomato+RBPMS+ Total	57	22	19	34	49
Fraction	0.473684	0.363636	0.526316	0.441176	0.306122
Percentage	0.473684	0.363636	0.526316	0.441176	0.306122
