# Supplementary material for: Afadin sorts different retinal neuron types into accurate cellular layers
Source: eLife. 2026 Jan 14;14:RP105575. doi: 10.7554/eLife.105575 (PMC12803510; doi:10.7554/eLife.105575)
Supplement: Figure 4—source data 1. [file elife-105575-fig4-data1.xlsx]

## Sheet: Sheet1
02/27/2019 ERG with Luca on 500C (DOB 01/26/2019)
CKO T2/4/5/7/10/11
CTRL T1/3/6/8/9/12
Dark rear overnight
Anesthetize with KX, dilate with trapicamide, methylcellulose
Light and dark and adapted and average both eyes, then do two tail t-test
For dark adapted there are 4 light steps, but choose second highest one for all measurements (30 cd.s/m2 white)
For photopic there are 5 light steps, but choose the fourth one for all measurements (10 cd.s/m2 white)
DARK ADAPTED	Right a	Left a	a-wave	Right b	Left b	b-wave		PHOTOPIC	Right a	Left a	a-wave	Right b	Left b	b-wave
Control T1	204.7	285	244.85	555.7	684.6	620.15		Control T1	11.75	20.77	16.26	100.1	96.65	98.375
Control T3	251.8	253.5	252.65	647.5	626.6	637.05		Control T3	6.171	7.043	6.607	223.5	221.3	222.4
Control T6	175.6	158.8	167.2	482.6	347.7	415.15		Control T6	2.742	3.897	3.3195	66.06	91.33	78.695
Control T8	299.8	284.2	292	621.3	581.7	601.5		Control T8	15.84	18.14	16.99	119.8	90.24	105.02
Control T9	273.3	268.7	271	718.6	681.4	700		Control T9	4.56	0.38	2.47	286.5	262.2	274.35
Control T12	154.6	216.6	185.6	343.4	482.2	412.8		Control T12	3.544	3.569	3.5565	81.36	72.96	77.16
CKO T2	18.66	2.614	10.637	86.86	82.63	84.745		CKO T2	19.51	19.2	19.355	20.3	21.89	21.095
CKO T4	21.03	16.41	18.72	143.2	148.9	146.05		CKO T4	5.231	2.072	3.6515	14.74	22.77	18.755
CKO T5	18.45	14.23	16.34	122.4	138.7	130.55		CKO T5	8.748	8.63	8.689	50.87	41.54	46.205
CKO T7	14.33	18.92	16.625	40.95	56.8	48.875		CKO T7	2.249	0.49	1.3695	39.1	33.64	36.37
CKO T10								CKO T10	11.1	8.462	9.781	112.5	113.5	113
CKO T11	22.61	22.47	22.54	47.14	26.67	36.905		CKO T11	11.54	2.255	6.8975	71.27	63.06	67.165
Control			235.55			564.442		Control			8.2005			142.667
CKO			16.9724			89.425		CKO			8.29058			50.4317
t-test			4.02521e-06			1.84845e-05		t-test			0.981247			0.0329408
48.9672						121.168		6.67802						84.2145
4.32175						48.2758		6.26362						35.4244
